# Supplementary material for: The murine vaginal microbiota and its perturbation by the human pathogen group B Streptococcus
Source: PubMed Central journal article supplement (PMC6260558; doi:10.1186/s12866-018-1341-2), 2018-11-26
Supplement: 12866_2018_1341_MOESM2_ESM.pdf [file 12866_2018_1341_MOESM2_ESM.pdf]

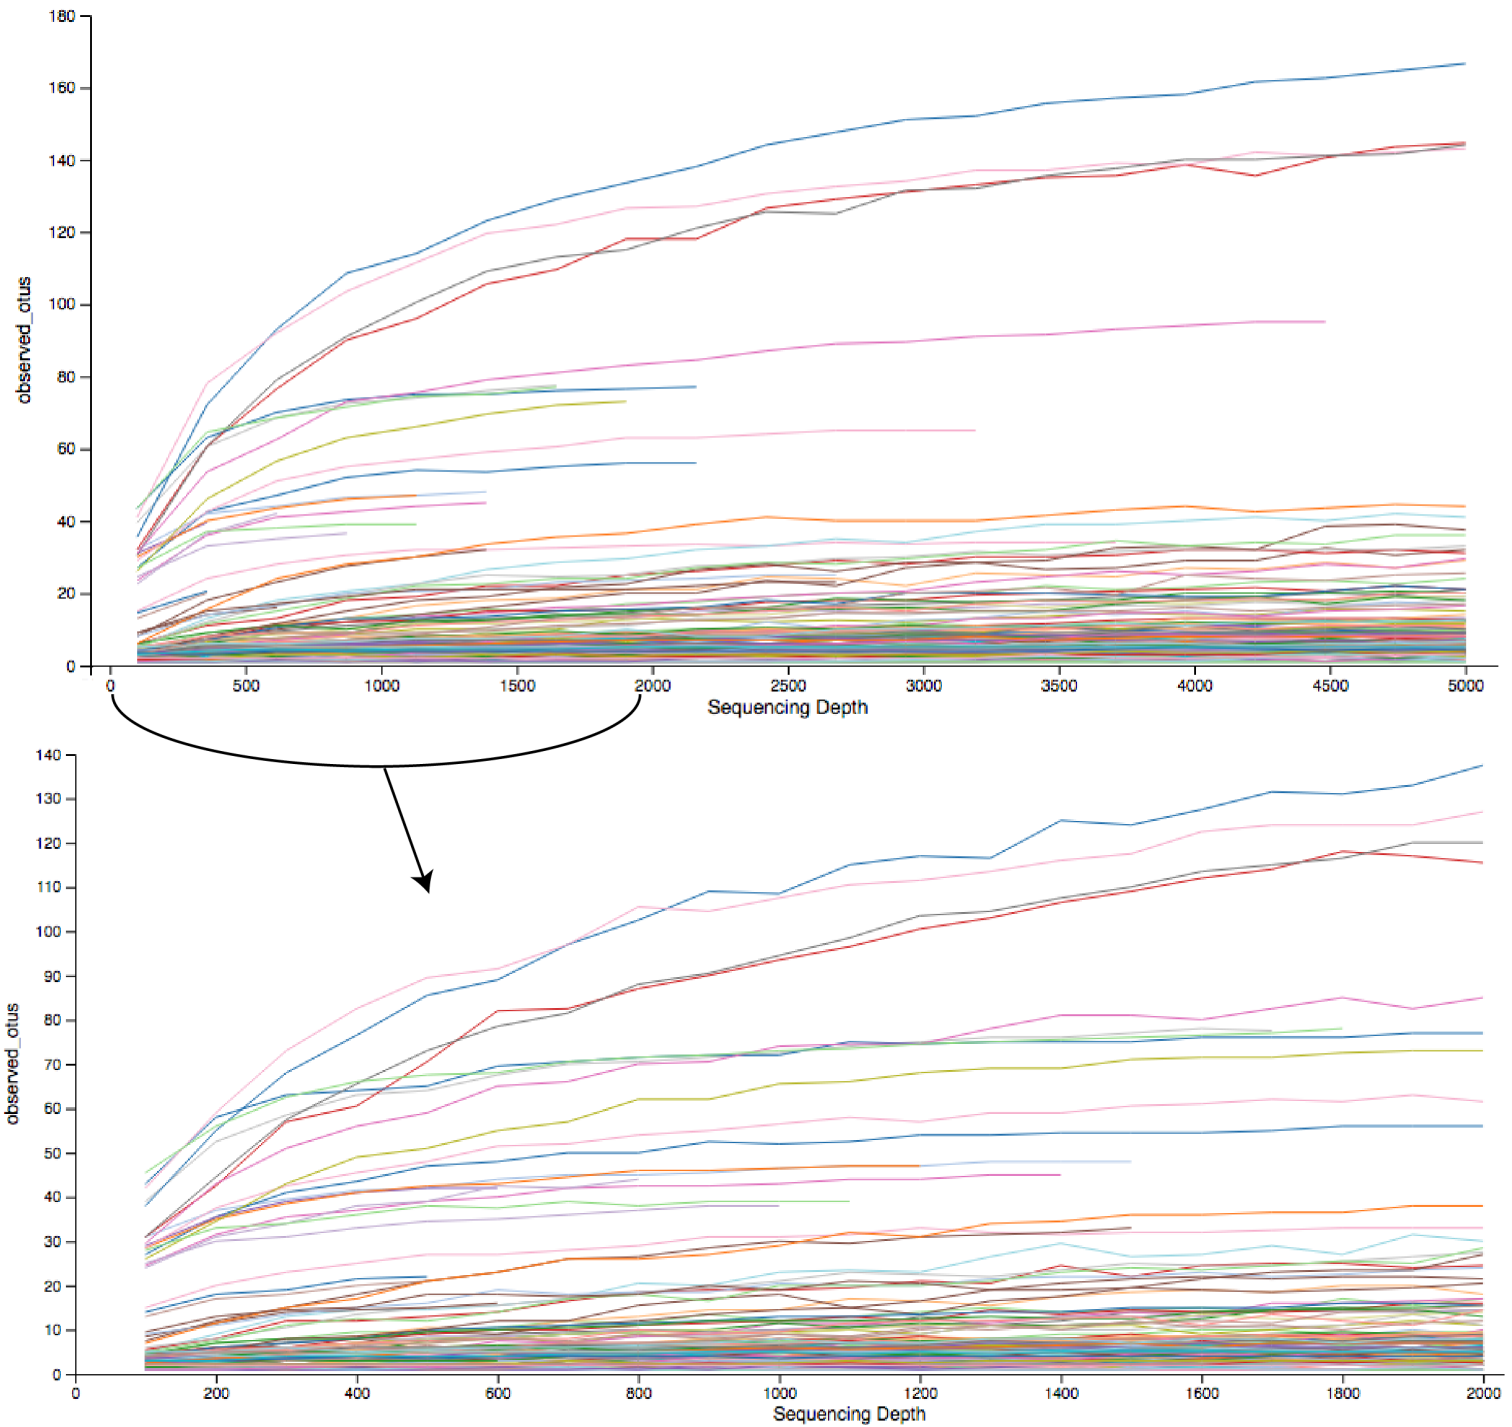

Additional file 2. **Rarefaction Curves for Estrous Staging Experiment.** Curves were generated with QIIME2 to calculate Observed OTUs alpha diversity for samples with contaminant, mitochondria, and chloroplast reads removed. Samples with less than 500 reads are not depicted in these images.
