# Supplementary material for: The murine vaginal microbiota and its perturbation by the human pathogen group B Streptococcus
Source: PubMed Central journal article supplement (PMC6260558; doi:10.1186/s12866-018-1341-2), 2018-11-26
Supplement: 12866_2018_1341_MOESM3_ESM.pdf [file 12866_2018_1341_MOESM3_ESM.pdf]

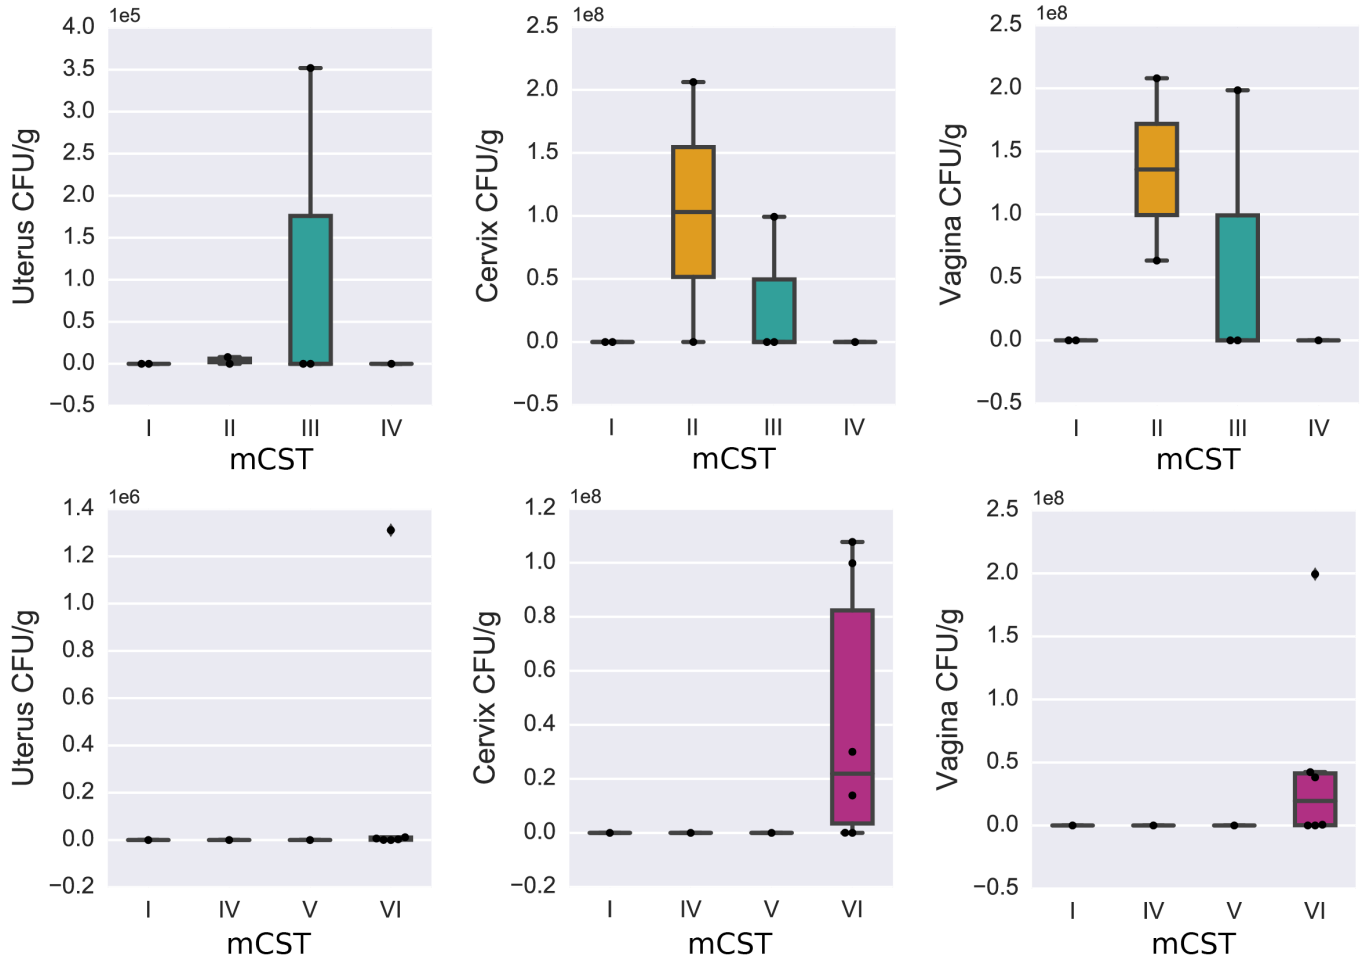

Additional file 3. **GBS CFU is only recovered in mCST VI mice on Day 21.** Tissue CFU/g on days 14 (top) and 21 (bottom) grouped according to mCST classification.
