# Supplementary material for: The murine vaginal microbiota and its perturbation by the human pathogen group B Streptococcus
Source: PubMed Central journal article supplement (PMC6260558; doi:10.1186/s12866-018-1341-2), 2018-11-26
Supplement: 12866_2018_1341_MOESM4_ESM.pdf [file 12866_2018_1341_MOESM4_ESM.pdf]

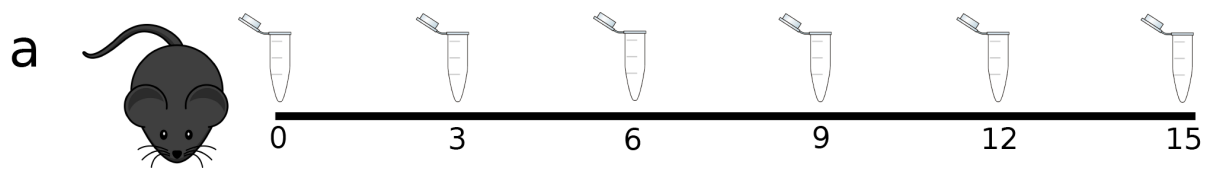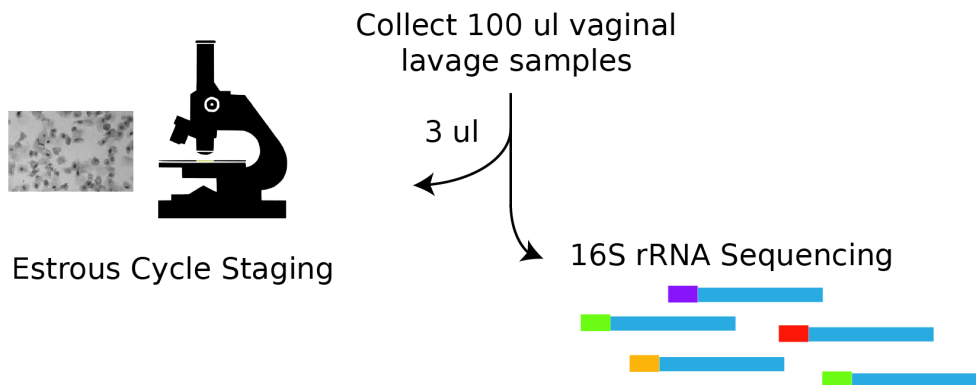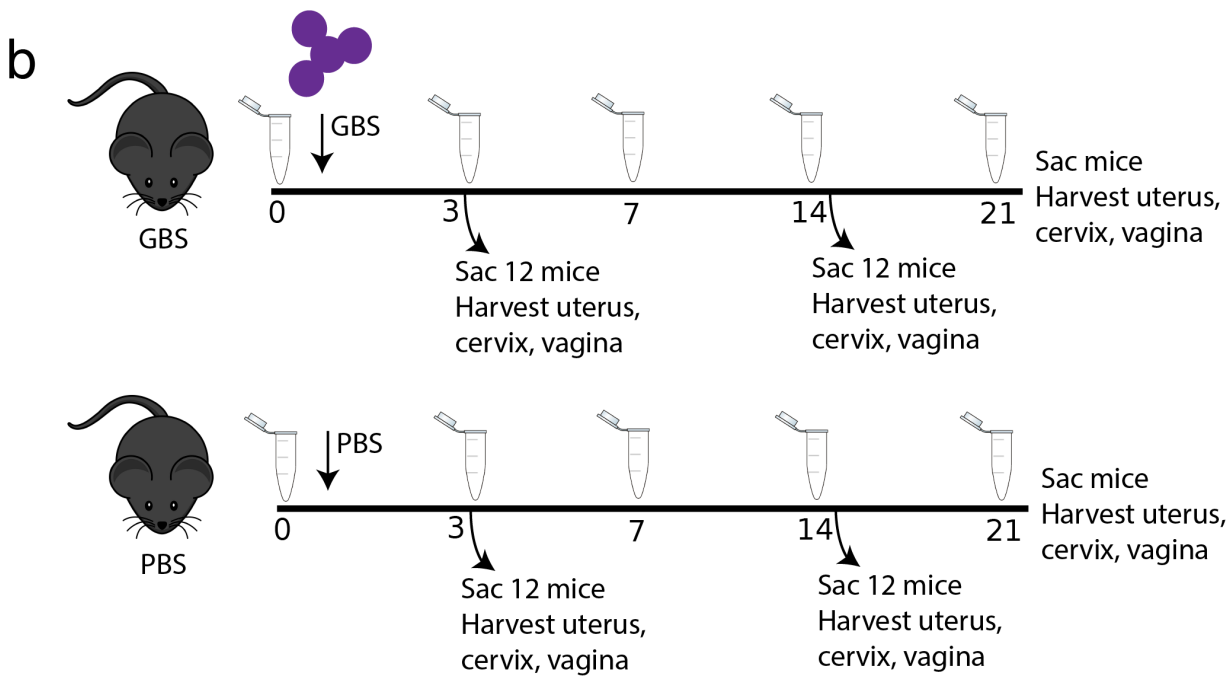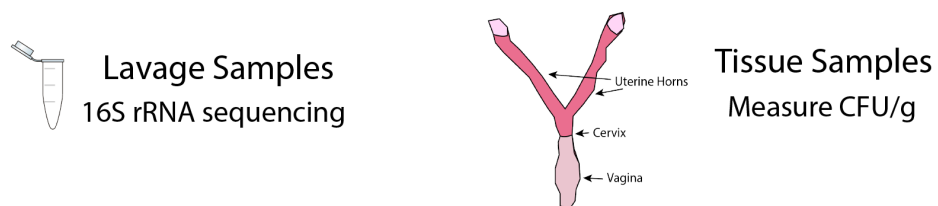

Additional file 4. **Murine Study Design** (a) Study 1: Estrous Cycle staging experiment, (b) Study 2: GBS Pathogen Challenge experiment. Mouse image is an open source image taken from Pixabay.
